# Supplementary material
Source: PubMed Central journal article supplement (PMC7875310)
Supplement: NIHMS1661273-supplement-1.pdf [file NIHMS1661273-supplement-1.pdf]

# THE LANCET

## Diabetes & Endocrinology

### Supplementary appendix

This appendix formed part of the original submission and has been peer reviewed. We post it as supplied by the authors.

Supplement to: Kitahara C M, Daltveit D S, Ekbom A, et al. Maternal health, in-utero, and perinatal exposures and risk of thyroid cancer in offspring: a Nordic population-based nested case-control study. *Lancet Diabetes Endocrinol* 2020; published online December 18. [http://dx.doi.org/10.1016/S2213-8587\(20\)30399-5](http://dx.doi.org/10.1016/S2213-8587(20)30399-5).

Supplementary Table 1. ICD codes used to classify the perinatal exposures and thyroid cancer outcomes

|                                                                                                                                                                                                                    |                                                                                                                                                                                                                                                                                                                       |
|--------------------------------------------------------------------------------------------------------------------------------------------------------------------------------------------------------------------|-----------------------------------------------------------------------------------------------------------------------------------------------------------------------------------------------------------------------------------------------------------------------------------------------------------------------|
| First primary thyroid cancer                                                                                                                                                                                       | ICD-8 and ICD-9 193; ICD-10 C73                                                                                                                                                                                                                                                                                       |
| <u>Thyroid cancer histology</u><br>Papillary carcinoma<br>Follicular carcinoma<br>Medullary carcinoma<br>Anaplastic carcinoma                                                                                      | ICD-O-3: 8050, 8260, 8340-8344, 8350, 8450-8460<br>8290, 8330-8335<br>8345, 8510-8513<br>8020-8035                                                                                                                                                                                                                    |
| <u>Single/multiple births</u><br>Singletons<br>Twins<br>Multiples<br>Unspecified                                                                                                                                   | ICD-8 Y80; ICD-10 Z37.0<br>ICD-8 Y81-Y83; ICD-10 O30.0, Z37.2-Z37.3<br>ICD-8 Y84-Y87; ICD-10 O30.1, O30.2, O30.8, Z37.5-Z37.6<br>ICD-8 Y89; ICD-10 O30.9, Z37.9                                                                                                                                                       |
| Preterm delivery                                                                                                                                                                                                   | ICD-10 O60.1, Z3A.01-Z3A.36, or based on gestational age                                                                                                                                                                                                                                                              |
| <u>Benign thyroid disease diagnoses (before/during pregnancy)</u><br>Hypothyroidism<br>Hyperthyroidism<br>Goiter<br>Thyroiditis<br>Benign neoplasm of thyroid gland<br>Other benign thyroid conditions             | ICD-8 244; ICD-10 E02, E03<br>ICD-8 242; ICD-10 E05<br>ICD-8 240, 241; ICD-10 E01, E04<br>ICD-8 245; ICD-10 E06<br>ICD-8 226, ICD-10 D34<br>ICD-8 246; ICD-10 E07                                                                                                                                                     |
| <u>Neonatal diagnoses</u><br>Congenital hypothyroidism<br>Neonatal jaundice                                                                                                                                        | ICD-8 243; ICD-10 E00, E03.0-E03.1<br>ICD-8 774, 775, 778.91, 778.99; ICD-10 P57-P59                                                                                                                                                                                                                                  |
| <u>Pregnancy complications</u><br>Preeclampsia/eclampsia<br>Gestational hypertension<br>Gestational diabetes<br>Postpartum hemorrhage<br>Placental abruption<br>Placenta previa<br>Hyperemesis<br>Pregnancy anemia | ICD-8 637.03-637.04, 637.09-637.10, 637.99; ICD-10 O11, O14-O15<br>ICD-8 637.00; ICD-10 O13, O19<br>ICD-8 634.74; ICD-10 O24.4, O99.81<br>ICD-8 653.0-653.9; ICD-10 O46, O72<br>ICD-8 632.10, 651.4; ICD-10 O45<br>ICD-8 632.0, 651.0-651.3; ICD-10 O44<br>ICD-8 638.09, 638.9; ICD-10 O21<br>ICD-8 633; ICD-10 O99.0 |
| <u>Pre-pregnancy diagnoses</u><br>Diabetes<br>Hypertension                                                                                                                                                         | ICD-8 249-250; ICD-10 E10.0-E11.9, Z79.4, O24.0-O24.3, O24.8-O24.9<br>ICD-10 O10-O11                                                                                                                                                                                                                                  |
